# Supplementary material for: Altered Gut Microbiota and Its Clinical Relevance in Mild Cognitive Impairment and Alzheimer’s Disease: Shanghai Aging Study and Shanghai Memory Study
Source: MDPI journal article supplement (doi:10.3390/nu14193959), 2022-09-23
Supplement: s1 [file s1]

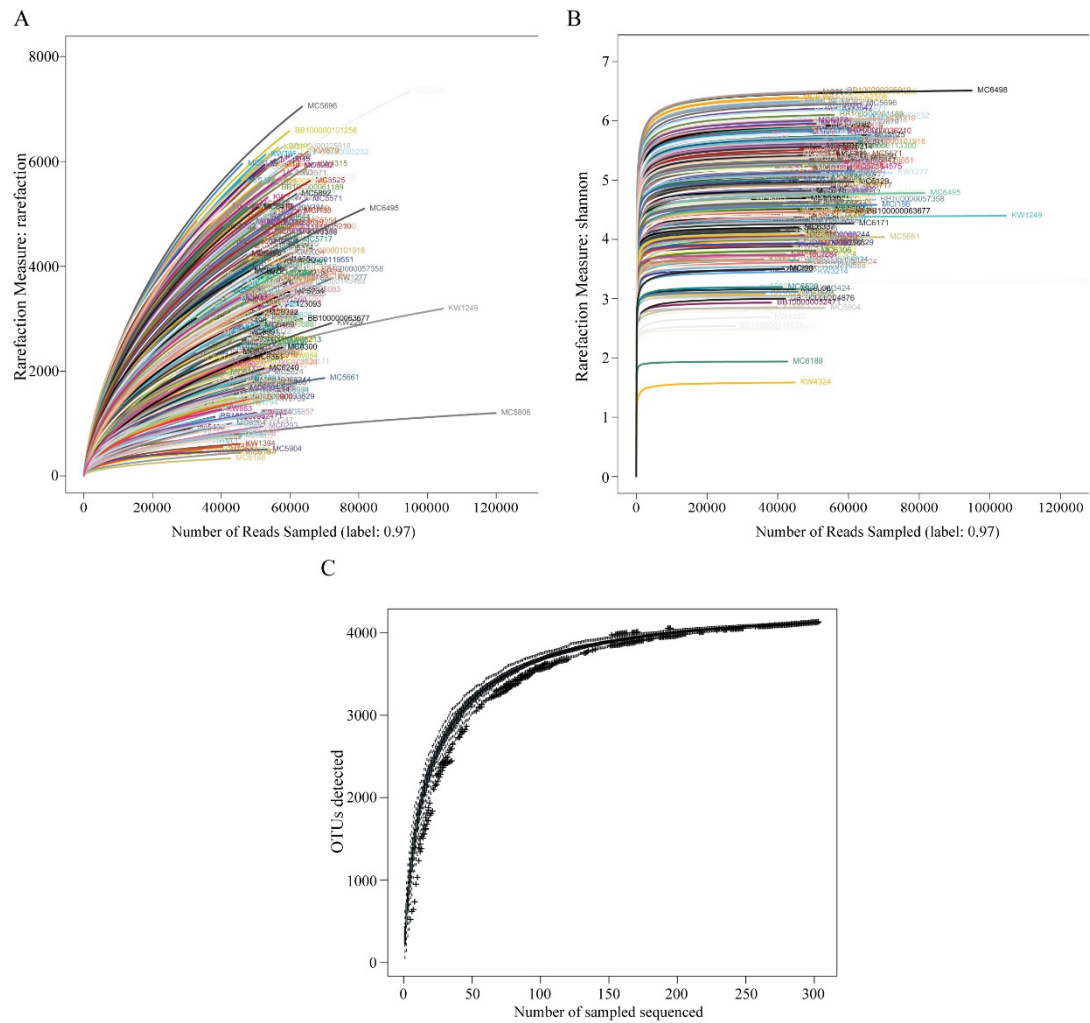

**Figure S1. Alpha diversity analysis of the gut microbiota in NC, MCI, and AD.**

Alpha diversity analysis of the gut microbiota among NC, MCI, and AD, illustrated by A. Rarefaction curves; B. Shannon-Wiener curves; C. Species accumulation curves. NC, cognitively normal controls; MCI, mild cognitive impairment; AD, Alzheimer's disease; OTUs, Operational taxonomic units.

**Table S1. The correlation (Corr) coefficients and P value of the five specific gut microbiota**

| <b>taxa with clinical characteristics</b> |                           |                    |                   |                 |                 |
|-------------------------------------------|---------------------------|--------------------|-------------------|-----------------|-----------------|
|                                           | Erysipelatoclostridiaceae | Erysipelotrichales | Saccharimonadales | Patescibacteria | Saccharimonadia |
| Age                                       | 0.066024202               | 0.048186319        | 0.162941006       | 0.162941006     | 0.162941006     |
|                                           | P>0.05                    | P>0.05             | P=0.0045          | P=0.0045        | P=0.0045        |
| Education                                 | -0.04574294               | -0.035431348       | -0.101498002      | -0.101498002    | -0.101498002    |
|                                           | P>0.05                    | P>0.05             | P>0.05            | P>0.05          | P>0.05          |
| MMSE                                      | -0.079646069              | -0.092068593       | -0.285270844      | -0.285270844    | -0.285270844    |
|                                           | P>0.05                    | P>0.05             | P=4.61e-07        | P=4.61e-07      | P=4.61e-07      |
| MoCA                                      | -0.105802869              | -0.113735467       | -0.228162636      | -0.228162636    | -0.228162636    |
|                                           | P>0.05                    | P>0.05             | P=5.31e-04        | P=5.31e-04      | P=5.31e-04      |
| Z_memory                                  | -0.160678551              | -0.18852155        | -0.174634342      | -0.174634342    | -0.174634342    |
|                                           | P=0.0087                  | P=0.002            | P=0.0043          | P=0.0043        | P=0.0043        |
| Z_attention                               | -0.089689796              | -0.115544157       | -0.057319084      | -0.057319084    | -0.057319084    |
|                                           | P>0.05                    | P>0.05             | P>0.05            | P>0.05          | P>0.05          |
| Z_visuospatial                            | -0.12996039               | -0.116307259       | -0.105414672      | -0.105414672    | -0.105414672    |
|                                           | P=0.0341                  | P>0.05             | P>0.05            | P>0.05          | P>0.05          |
| Z_executive                               | -0.082433706              | -0.075605569       | -0.209663066      | -0.209663066    | -0.209663066    |
|                                           | P>0.05                    | P>0.05             | P=5.78e-04        | P=5.78e-04      | P=5.78e-04      |
| Z_language                                | -0.094812701              | -0.112472813       | -0.189420894      | -0.189420894    | -0.189420894    |
|                                           | P>0.05                    | P>0.05             | P=0.0019          | P=0.0019        | P=0.0019        |
| CDR                                       | 0.113356807               | 0.127017794        | 0.314628499       | 0.314628499     | 0.314628499     |
|                                           | P=0.0494                  | P=0.0276           | P=2.43e-08        | P=2.43e-08      | P=2.43e-08      |
| ADL                                       | -0.023100965              | -0.008717582       | 0.231340891       | 0.231340891     | 0.231340891     |
|                                           | P>0.05                    | P>0.05             | P=5.87e-05        | P=5.87e-05      | P=5.87e-05      |

MMSE, Mini-mental State Examination; MoCA, Montreal Cognitive Assessment; ADL, Activities of Daily Living; CDR, Clinical Dementia Rating. The composite Z scores were computed for specific cognitive domains including memory, attention, visuospatial ability, Language, and Executive function.

**Table S2. The P value of abundance comparisons of five specific taxa among different clinical subgroups**

| Subgroup comparison                     | Erysipelatoclostridiaceae | Erysipelotrichales | Saccharimonadales | Patescibacteria | Saccharimonadia |
|-----------------------------------------|---------------------------|--------------------|-------------------|-----------------|-----------------|
| NC vs. MCI                              | 0.005645                  | 0.02662            | 0.007575          | 0.007575        | 0.007575        |
| NC vs. AD                               | 6.32E-06                  | 8.28E-06           | 8.37E-05          | 8.37E-05        | 8.37E-05        |
| MCI vs. AD                              | 0.0299                    | 0.008745           | 0.04777           | 0.04777         | 0.04777         |
| Comparison among NC, MCI and AD         | 3.03E-05                  | 4.54E-05           | 0.000211          | 0.000211        | 0.000211        |
| CDR 0 vs. 0.5                           | 3.10E-05                  | 0.0003111          | 0.004855          | 0.004855        | 0.004855        |
| CDR 0 vs. 1                             | 7.57E-05                  | 2.47E-05           | 0.00652           | 0.00652         | 0.00652         |
| CDR 0 vs. 2                             | 6.13E-06                  | 4.59E-05           | 0.000779          | 0.000779        | 0.000779        |
| CDR 0 vs. 3                             | 0.0286                    | 0.07643            | 0.01093           | 0.01093         | 0.01093         |
| CDR 0.5 vs. 1                           | 0.3456                    | 0.05666            | 0.4117            | 0.4117          | 0.4117          |
| CDR 0.5 vs. 2                           | 0.0408                    | 0.06467            | 0.07114           | 0.07114         | 0.07114         |
| CDR 0.5 vs. 3                           | 0.5797                    | 0.4941             | 0.03867           | 0.03867         | 0.03867         |
| CDR 1 vs. 2                             | 0.3037                    | 0.8813             | 0.4025            | 0.4025          | 0.4025          |
| CDR 1 vs. 3                             | 0.921                     | 0.9125             | 0.1355            | 0.1355          | 0.1355          |
| CDR 2 vs. 3                             | 0.7158                    | 0.8555             | 0.2676            | 0.2676          | 0.2676          |
| Comparison among CDR 0, 0.5, 1, 2 and 3 | 2.52E-06                  | 1.19E-05           | 0.0005255         | 0.0005255       | 0.0005255       |
| <i>APOE</i> 4- vs. <i>APOE</i> 4+       | 0.01978                   | 0.004703           | 0.01303           | 0.01303         | 0.01303         |

NC, cognitively normal controls; MCI, mild cognitive impairment; AD, Alzheimer's disease. AD, Alzheimer's disease; CDR, Clinical Dementia Rating. APOE, apolipoprotein E.

**Table S3. The P value of abundance comparisons of five specific taxa among different clinical subgroups in participants aged  $\geq 60$  yrs.**

| Subgroup comparison                     | Erysipelatoclostridiaceae | Erysipelotrichales | Saccharimonadales | Patescibacteria | Saccharimonadia |
|-----------------------------------------|---------------------------|--------------------|-------------------|-----------------|-----------------|
| NC vs. MCI                              | 0.006                     | 0.035              | 0.031             | 0.031           | 0.031           |
| NC vs. AD                               | < 0.001                   | < 0.001            | < 0.001           | < 0.001         | < 0.001         |
| MCI vs. AD                              | 0.202                     | 0.064              | 0.195             | 0.195           | 0.195           |
| Comparison among NC, MCI and AD         | < 0.001                   | < 0.001            | < 0.001           | < 0.001         | < 0.001         |
| CDR 0 vs. 0.5                           | 0.001                     | 0.008              | 0.077             | 0.077           | 0.077           |
| CDR 0 vs. 1                             | 0.001                     | < 0.001            | 0.092             | 0.092           | 0.092           |
| CDR 0 vs. 2                             | 0                         | < 0.001            | 0.003             | 0.003           | 0.003           |
| CDR 0 vs. 3                             | 1                         | 1                  | 0.095             | 0.095           | 0.095           |
| CDR 0.5 vs. 1                           | 1                         | 0.713              | 1                 | 1               | 1               |
| CDR 0.5 vs. 2                           | 0.427                     | 0.622              | 0.565             | 0.565           | 0.565           |
| CDR 0.5 vs. 3                           | 1                         | 1                  | 0.725             | 0.725           | 0.725           |
| CDR 1 vs. 2                             | 1                         | 1                  | 1                 | 1               | 1               |
| CDR 1 vs. 3                             | 1                         | 1                  | 1                 | 1               | 1               |
| CDR 2 vs. 3                             | 1                         | 1                  | 1                 | 1               | 1               |
| Comparison among CDR 0, 0.5, 1, 2 and 3 | < 0.001                   | < 0.001            | 0.001             | < 0.001         | < 0.001         |
| APOE 4- vs. APOE 4+                     | < 0.001                   | < 0.001            | 0.012             | 0.012           | 0.012           |

NC, cognitively normal controls; MCI, mild cognitive impairment; AD, Alzheimer's disease. AD, Alzheimer's disease; CDR, Clinical Dementia Rating. APOE, apolipoprotein E.
